# Supplementary material for: Proteomic analysis of AQP11-null kidney: Proximal tubular type polycystic kidney disease
Source: PubMed Central journal article supplement — Biochem Biophys Rep. 2017 Nov 23;13:17–21. doi: 10.1016/j.bbrep.2017.11.003 (PMC5709289; doi:10.1016/j.bbrep.2017.11.003), 2017-11-23
Supplement: mmc1.pdf [file mmc1.pdf]

## **ICMJE Form for Disclosure of Potential Conflicts of Interest**

---

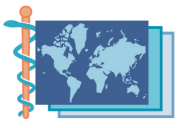

## ICMJE Form for Disclosure of Potential Conflicts of Interest

---

| Name of Institution/Company |  |  |  |  | Comments |
|-----------------------------|--|--|--|--|----------|
|-----------------------------|--|--|--|--|----------|

| Name of Entity |  |  |  |  | Comments |
|----------------|--|--|--|--|----------|
|----------------|--|--|--|--|----------|

## ICMJE Form for Disclosure of Potential Conflicts of Interest

---
